# Supplementary material for: Catalytic dechlorination of polychlorinated biphenyls (PCBs) using amine functionalised titanocenes
Source: Royal Society of Chemistry journal article supplement (doi:10.1039/b906311k), 2009-01-01
Supplement: b906311k.pdf [file b906311k.pdf]

## ELECTRONIC SUPPLEMENTARY DATA

# Catalytic dechlorination of polychlorinated biphenyls (PCBs) using amine functionalised titanocenes

Andrew E.D. Fletcher, Jonathan D. Hyatt, Kang Min Ok and Dermot O'Hare

## Contents

- Sup 1:**  $^{11}\text{B}$  NMR data for diglyme solutions of various catalysts with one equivalent of  $\text{BH}_3\cdot\text{THF}$  and Schwartz reactions of  $\text{Cp}_2\text{TiCl}_2$  with different bases. Samples run at room temperature and data corrected relative to a  $\text{PPN}[\text{BH}_4]$  in  $\text{CHCl}_3$  insert
- Sup 2:**  $^{11}\text{B}$  NMR data obtained from aliquots of various Schwartz reactions. Samples run in diglyme at room temperature and data corrected relative to a  $\text{PPN}[\text{BH}_4]$  in  $\text{CHCl}_3$  insert.
- Sup 3:** Crystal data and refinement details for (4).
- Sup 4:** Bond lengths (Å) for (4).
- Sup 5:** Bond angles ( $^\circ$ ) for (4).

**SUP 1**  $^{11}\text{B}$  NMR data for diglyme solutions of various catalysts with one equivalent of  $\text{BH}_3\cdot\text{THF}$  and Schwartz reactions of  $\text{Cp}_2\text{TiCl}_2$  with different bases. Samples run at room temperature and data corrected relative to a  $\text{PPN}[\text{BH}_4]$  in  $\text{CHCl}_3$  insert

| Species                                                                                                                 | Chemical Shift (ppm) | $J(^{11}\text{B}-^1\text{H})$ (Hz) | Multiplicity |
|-------------------------------------------------------------------------------------------------------------------------|----------------------|------------------------------------|--------------|
| 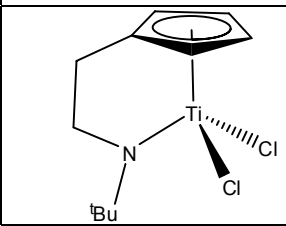<br>$\cdot\text{BH}_3$<br><b>(4)</b>   | -6.43                | 103.4                              | q            |
| <br>$\cdot\text{BH}_3$<br><b>(5)</b>   | -6.27                | 107.4                              | q            |
| <br>$\cdot\text{BH}_3$<br><b>(6)</b>  | -7.17                | 106.0                              | q            |
| <br>$\cdot\text{BH}_3$<br><b>(7)</b> | -5.97                | 106.0                              | q            |
| Pyridine $\cdot\text{BH}_3$                                                                                             | -1.94                | 95.3                               | q            |
| DMO $\cdot\text{BH}_3$                                                                                                  | -1.66                | 96.9                               | q            |
| Diglyme with $\text{BH}_3\cdot\text{THF}$                                                                               | 16.43                | 16.8                               | q            |

**Sup 2**  $^{11}\text{B}$  NMR data obtained from aliquots of various Schwartz reactions. Samples run in diglyme at room temperature and data corrected relative to a  $\text{PPN}[\text{BH}_4]$  in  $\text{CHCl}_3$  insert

| Schwartz reaction                                                                                                  | Time of aliquot (hours) | Data at given reaction time |                                    |              |
|--------------------------------------------------------------------------------------------------------------------|-------------------------|-----------------------------|------------------------------------|--------------|
|                                                                                                                    |                         | Chemical shift (ppm)        | $J(^{11}\text{B}-^1\text{H})$ (Hz) | Multiplicity |
| 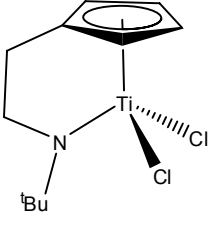 <p>(4.12)<br/>with pyridine</p>  | 0                       | -5.85                       | 93.1                               | q            |
|                                                                                                                    | 1                       | -5.94                       | 104.8                              | q            |
|                                                                                                                    | 24                      | Too broad                   |                                    |              |
|  <p>(4.13)<br/>with pyridine</p>  | 0                       | -5.82                       | 100.8                              | q            |
|                                                                                                                    | 1                       | 6.22                        | 104.8                              | q            |
|                                                                                                                    | 24                      | 8.06, -18.90                | Unknown                            |              |
|  <p>(4.14)<br/>with pyridine</p> | 0                       | -5.89                       | 97.0                               | q            |
|                                                                                                                    | 1                       | -5.34, -3.34                | Unknown                            |              |
|                                                                                                                    | 24                      | -9.25, -20.93               | Unknown                            |              |
|  <p>(4.14)<br/>with DMO</p>     | 0                       | -3.15                       | 81.4                               | q            |
|                                                                                                                    | 1                       | -3.67                       | 95.7                               | q            |
|                                                                                                                    | 24                      | -3.39                       | 91.9                               | q            |
|  <p>with pyridine</p>           | 0                       | -5.66                       | 107.4                              | q            |
|                                                                                                                    | 1                       | -5.85                       | 100.8                              | q            |
|                                                                                                                    | 24                      | Too broad                   |                                    |              |
|  <p>with DMO</p>                | 0                       | -3.27                       | 93.1                               | q            |
|                                                                                                                    | 1                       | -3.44                       | 87.9                               | q            |
|                                                                                                                    | 24                      | -3.41                       | 92.4                               | q            |

### Sup 3: Crystal data and refinement details for (4)

|                                                             |                                                                |
|-------------------------------------------------------------|----------------------------------------------------------------|
| Crystal identification                                      | jh2                                                            |
| Chemical formula                                            | C <sub>11</sub> H <sub>17</sub> Cl <sub>2</sub> NTi            |
| Formula weight                                              | 282.06                                                         |
| Temperature (K)                                             | 150.0(2)                                                       |
| Wavelength (Å)                                              | 0.71073                                                        |
| Crystal system                                              | Monoclinic                                                     |
| Space group                                                 | <i>P2<sub>1</sub>/m</i>                                        |
| <i>a</i> (Å)                                                | 7.3084(15)                                                     |
| <i>b</i> (Å)                                                | 10.576(2)                                                      |
| <i>c</i> (Å)                                                | 8.5363(17)                                                     |
| $\alpha$ (°)                                                | 90                                                             |
| $\beta$ (°)                                                 | 102.70(3)                                                      |
| $\gamma$ (°)                                                | 90                                                             |
| Cell volume (Å <sup>3</sup> )                               | 643.7(2)                                                       |
| <i>Z</i>                                                    | 2                                                              |
| Calculated density (g/cm <sup>3</sup> )                     | 1.455                                                          |
| Absorption coefficient (mm <sup>-1</sup> )                  | 1.048                                                          |
| <i>F</i> <sub>000</sub>                                     | 292                                                            |
| Crystal size (mm)                                           | 0.06 x 0.08 x 0.26                                             |
| Description of crystal                                      | Red prism                                                      |
| Absorption correction                                       | None                                                           |
| $\theta$ range for data collection (°)                      | 6.0 ≤ $\theta$ ≤ 27.5                                          |
| Index ranges                                                | -9 ≤ <i>h</i> ≤ 9, -13 ≤ <i>k</i> ≤ 12, -11 ≤ <i>l</i> ≤ 11    |
| Reflections measured                                        | 2695                                                           |
| Unique reflections                                          | 1534                                                           |
| <i>R</i> <sub>int</sub>                                     | 0.018                                                          |
| Reflections collected ( <i>I</i> > 3 $\sigma$ ( <i>I</i> )) | 2695                                                           |
| Refinement method                                           | Full-matrix least-squares on <i>F</i> <sup>2</sup> [SHELXL-97] |
| Parameters refined                                          | 89                                                             |
| Weighting scheme                                            | Chebychev 3-term polynomial                                    |
| Goodness of fit                                             | 1.074                                                          |
| <i>R</i> <sub>1</sub> <sup>a</sup>                          | 0.0393                                                         |
| <i>wR</i> <sub>2</sub> <sup>b</sup>                         | 0.0975                                                         |
| Residual electron density (min, max) (e Å <sup>-3</sup> )   | -0.407, 0.346                                                  |

$$^a R(F) = \sum ||F_o| - |F_c|| / \sum |F_o|. \quad ^b wR_2(F_o^2) = [\sum w(F_o^2 - F_c^2)^2 / \sum w(F_o^2)^2]^{1/2}.$$

**Sup 4: Bond lengths (Å) for (4)**

|               |           |             |          |
|---------------|-----------|-------------|----------|
| Ti(1) - N(1)  | 1.899(3)  | N(1) - C(5) | 1.524(5) |
| Ti(1) - Cl(1) | 2.2871(8) | C(1) - C(1) | 1.402(5) |
| Ti(1) - Cl(1) | 2.2871(8) | C(1) - C(2) | 1.409(3) |
| Ti(1) - C(3)  | 2.334(3)  | C(2) - C(3) | 1.405(3) |
| Ti(1) - C(2)  | 2.340(2)  | C(3) - C(2) | 1.405(3) |
| Ti(1) - C(2)  | 2.340(2)  | C(3) - C(4) | 1.494(4) |
| Ti(1) - C(1)  | 2.360(2)  | C(4) - C(5) | 1.426(5) |
| Ti(1) C(1)    | 2.360(2)  | C(4) - C(5) | 1.426(5) |
| N(1) - C(6)   | 1.513(4)  | C(6) - C(8) | 1.516(6) |
| N(1) - C(5)   | 1.524(5)  | C(6) - C(7) | 1.520(4) |

Note – H atoms have been excluded

**Sup 5: Bond angles (°) for (4)**

|                       |            |                     |            |
|-----------------------|------------|---------------------|------------|
| N(1) - Ti(1) - Cl(1)  | 108.35(5)  | C(6) - N(1) - C(5)  | 111.2(3)   |
| N(1) - Ti(1) - Cl(1)  | 108.35(5)  | C(6) - N(1) - C(5)  | 111.2(3)   |
| Cl(1) - Ti(1) - Cl(1) | 105.25(4)  | C(5) - N(1) - C(5)  | 32.0(3)    |
| N(1) - Ti(1) - C(3)   | 75.47(11)  | C(6) - N(1) - Ti(1) | 124.0(2)   |
| Cl(1) - Ti(1) - C(3)  | 125.55(3)  | C(5) - N(1) - Ti(1) | 122.4(2)   |
| Cl(1) - Ti(1) - C(3)  | 125.55(3)  | C(5) - N(1) - Ti(1) | 122.4(2)   |
| N(1) - Ti(1) - C(2)   | 95.31(9)   | C(1) - C(1) - C(2)  | 107.82(14) |
| Cl(1) - Ti(1) - C(2)  | 143.80(7)  | C(1) - C(1) - Ti(1) | 72.73(6)   |
| Cl(1) - Ti(1) - C(2)  | 92.19(7)   | C(2) - C(1) - Ti(1) | 71.79(13)  |
| C(3) - Ti(1) - C(2)   | 34.99(7)   | C(3) - C(2) - C(1)  | 108.5(2)   |
| N(1) Ti(1) - C(2)     | 95.31(9)   | C(3) - C(2) - Ti(1) | 72.24(15)  |
| Cl(1) - Ti(1) - C(2)  | 92.19(7)   | C(1) - C(2) - Ti(1) | 73.35(14)  |
| Cl(1) - Ti(1) - C(2)  | 143.80(7)  | C(2) - C(3) - C(2)  | 107.3(3)   |
| C(3) - Ti(1) - C(2)   | 34.99(7)   | C(2) - C(3) - C(4)  | 125.76(14) |
| C(2) - Ti(1) - C(2)   | 57.85(12)  | C(2) - C(3) - C(4)  | 125.76(14) |
| N(1) - Ti(1) - C(1)   | 129.70(10) | C(2) - C(3) - Ti(1) | 72.77(15)  |
| Cl(1) - Ti(1) - C(1)  | 113.78(7)  | C(2) - C(3) - Ti(1) | 72.77(15)  |
| Cl(1) - Ti(1) - C(1)  | 86.06(7)   | C(4) - C(3) - Ti(1) | 110.6(2)   |
| C(3) - Ti(1) - C(1)   | 58.21(9)   | C(5) - C(4) - C(5)  | 34.3(3)    |
| C(2) - Ti(1) - C(1)   | 34.87(8)   | C(5) - C(4) - C(3)  | 111.1(3)   |
| C(2) - Ti(1) - C(1)   | 57.78(9)   | C(5) - C(4) - C(3)  | 111.1(3)   |
| N(1) - Ti(1) - C(1)   | 129.70(10) | C(4) - C(5) - N(1)  | 110.4(3)   |
| Cl(1) - Ti(1) - C(1)  | 86.06(7)   | N(1) - C(6) - C(8)  | 111.1(3)   |
| Cl(1) - Ti(1) - C(1)  | 113.78(7)  | N(1) - C(6) - C(7)  | 109.2(2)   |
| C(3) - Ti(1) - C(1)   | 58.21(9)   | C(8) - C(6) - C(7)  | 108.7(2)   |
| C(2) - Ti(1) - C(1)   | 57.78(9)   | N(1) - C(6) - C(7)  | 109.2(2)   |
| C(2) - Ti(1) - C(1)   | 34.87(8)   | C(8) - C(6) - C(7)  | 108.7(2)   |
| C(1) - Ti(1) - C(1)   | 34.55(13)  | C(7) - C(6) - C(7)  | 109.9(3)   |

Note – H atoms have been excluded
